# Supplementary material for: Folliculin promotes substrate-selective mTORC1 activity by activating RagC to recruit TFE3
Source: PubMed Central journal article supplement (PMC9004751; doi:10.1371/journal.pbio.3001594), 2022-03-31

Fig 1A

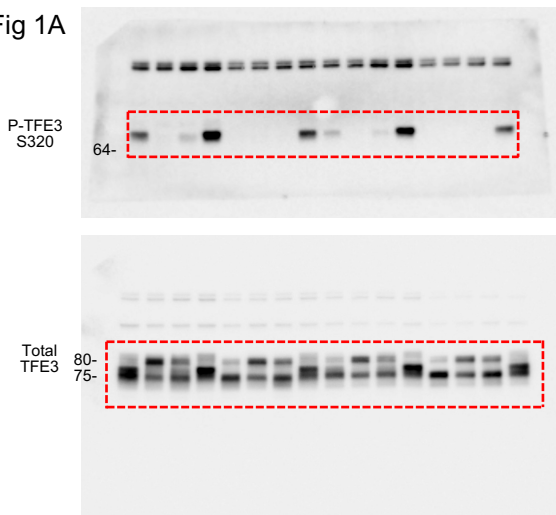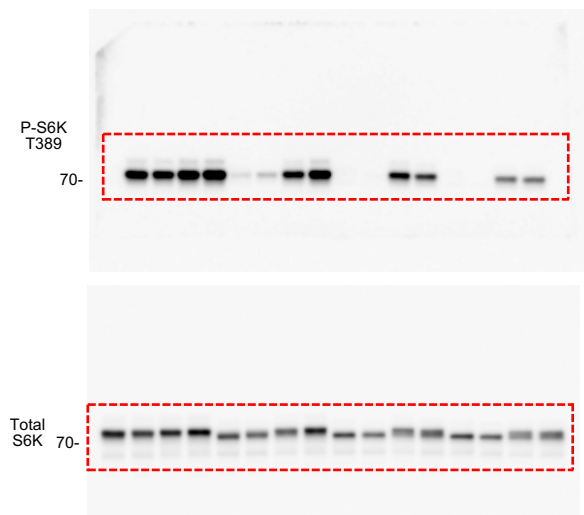

Fig 1C

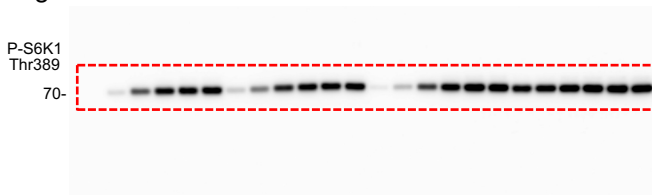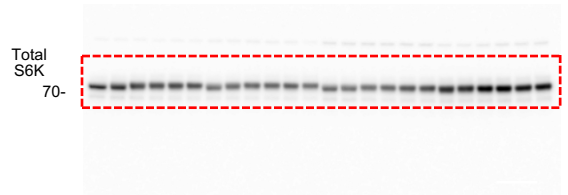

Fig 1D

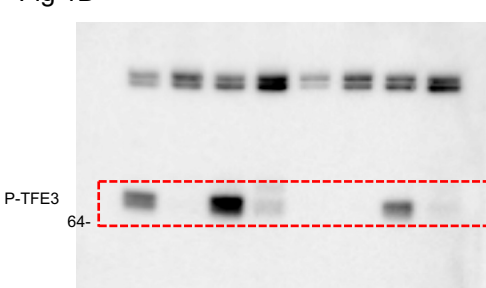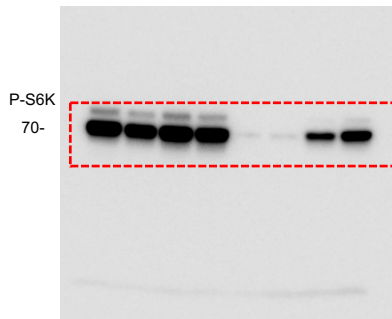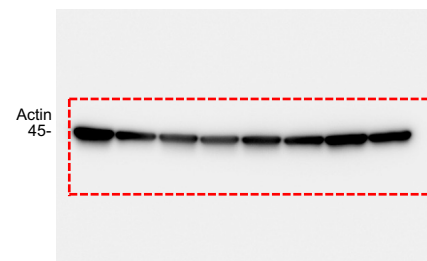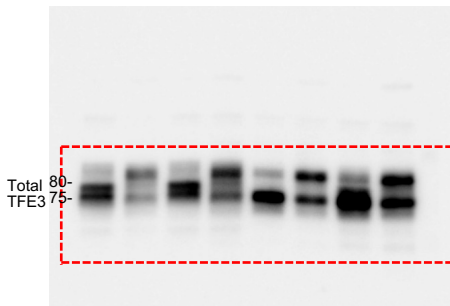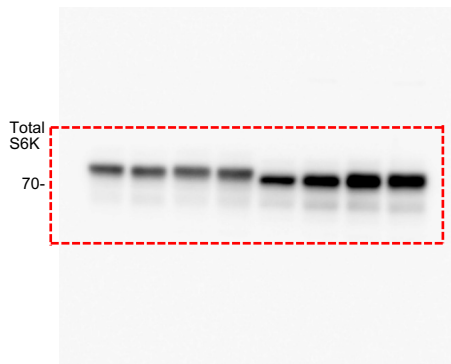

Fig 2A

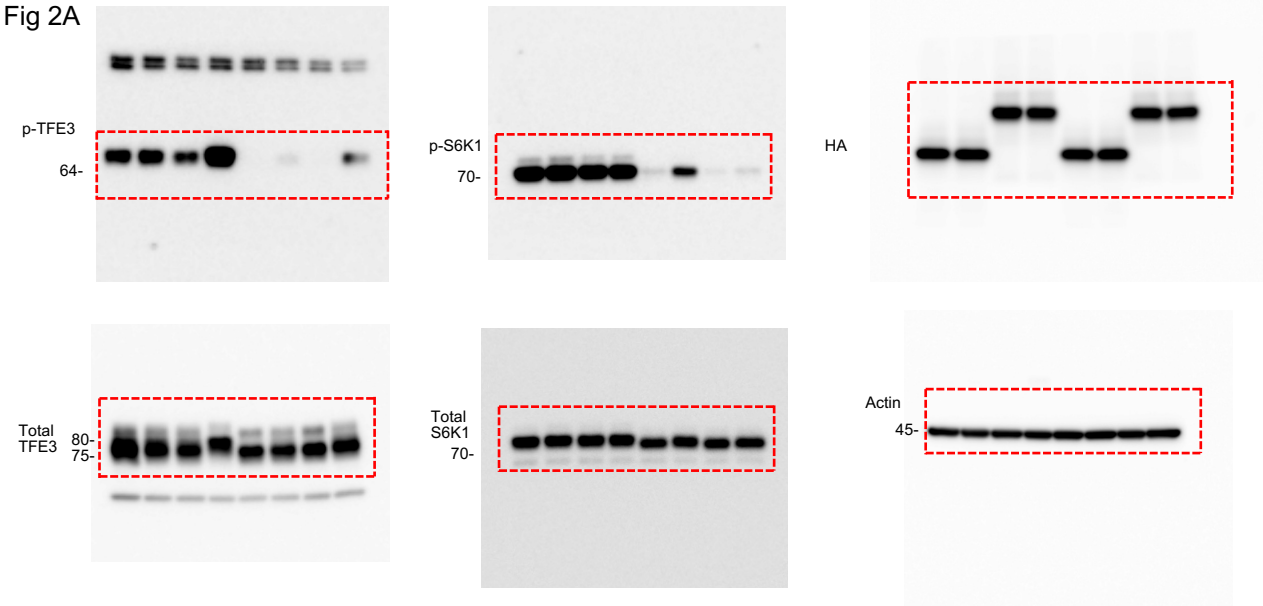

Fig 2C

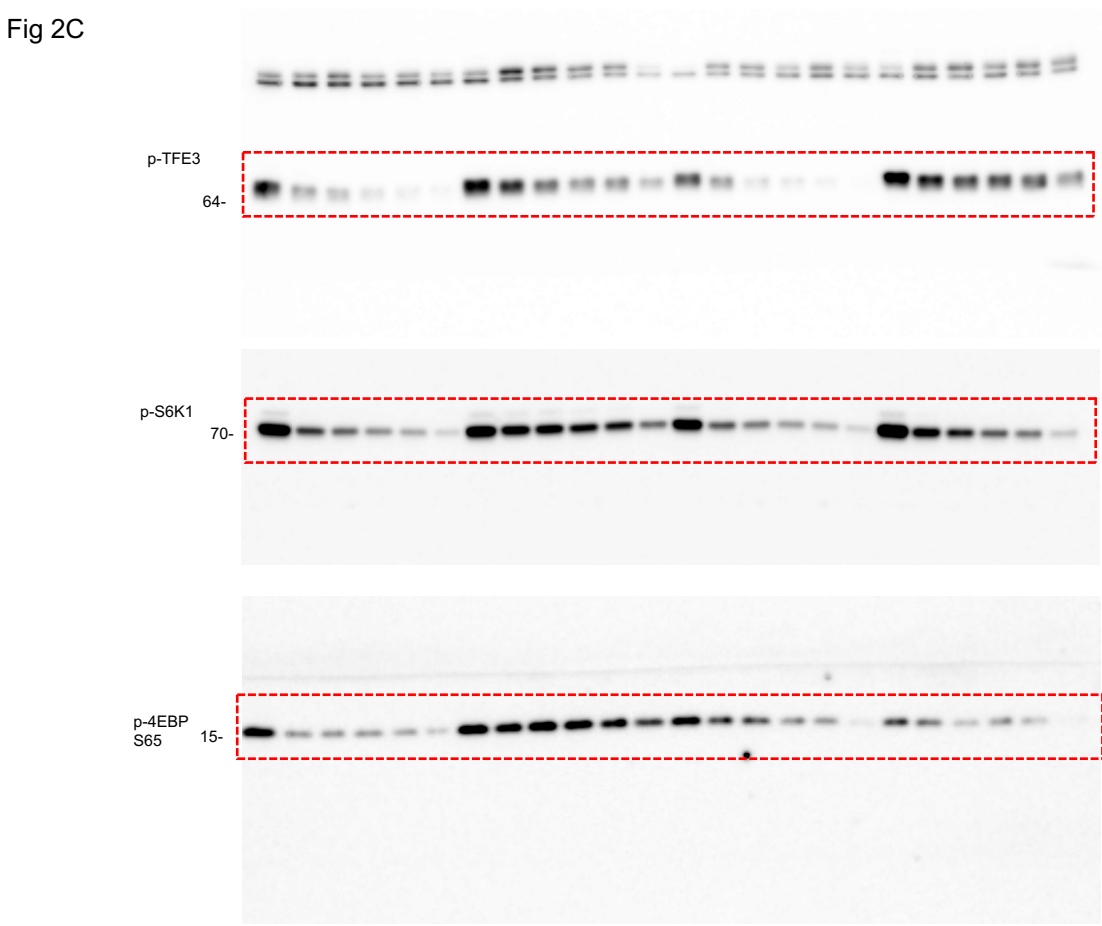

Fig 3A

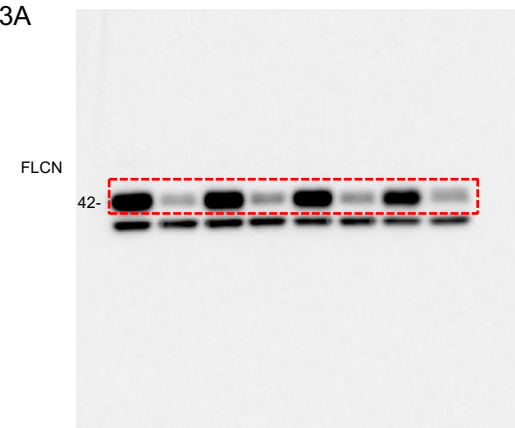

P-S6K1  
T389

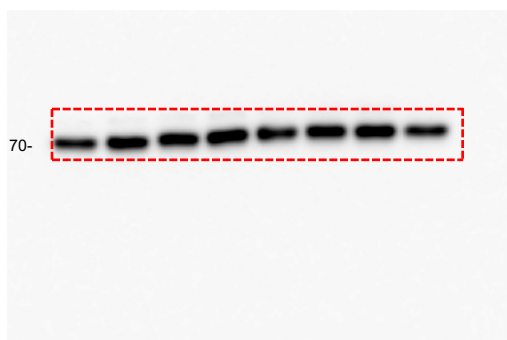

P-TFE3  
S320

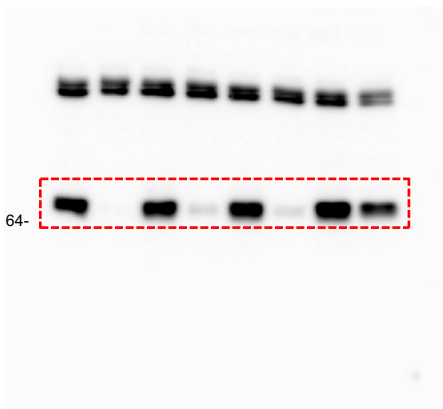

Total  
S6K1

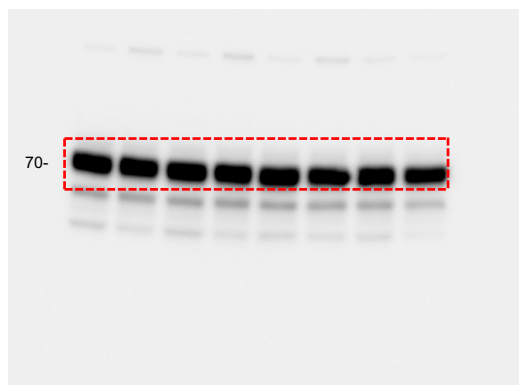

Total  
TFE3

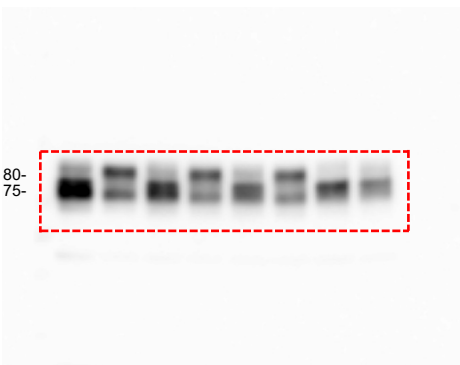

Actin

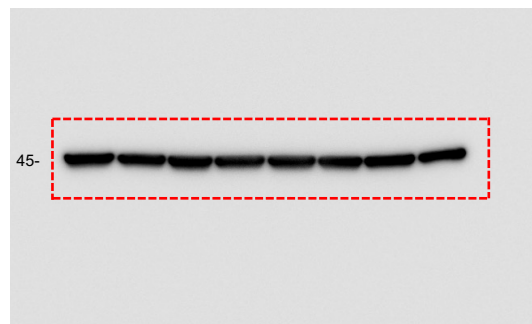

Fig 5A

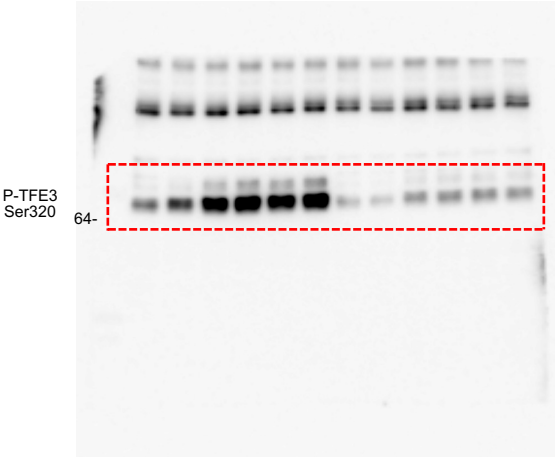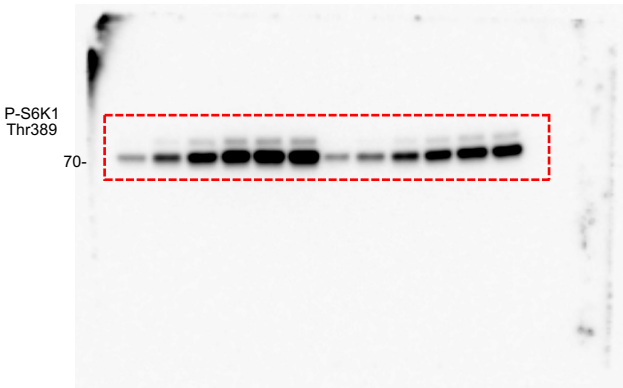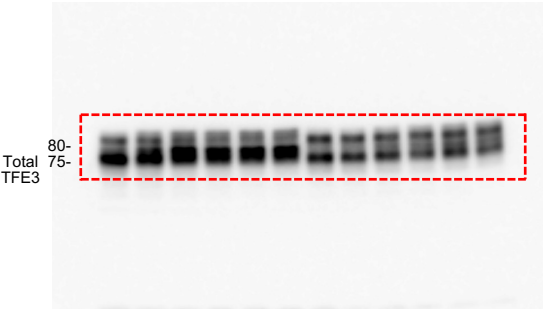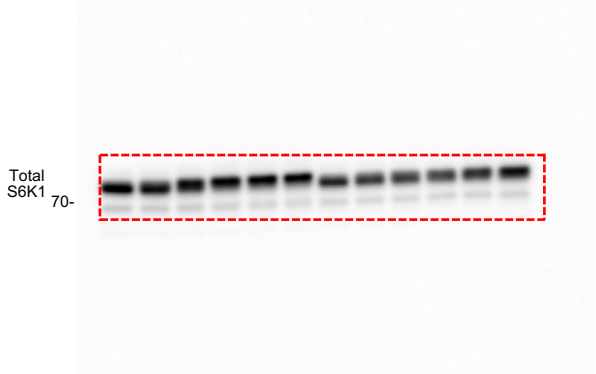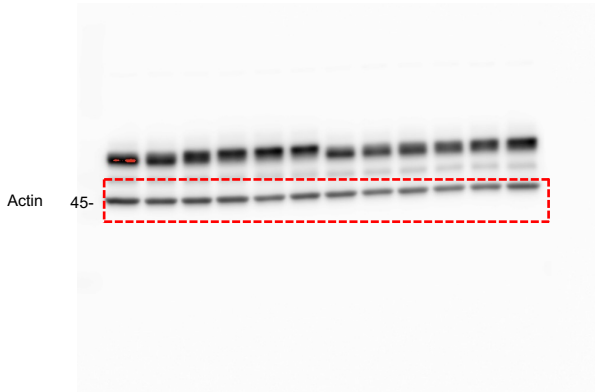

## S2A

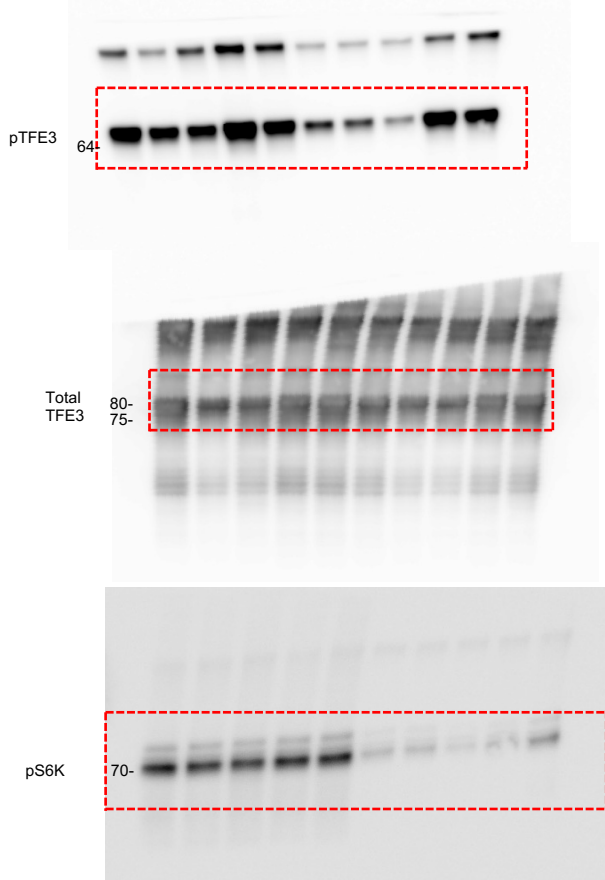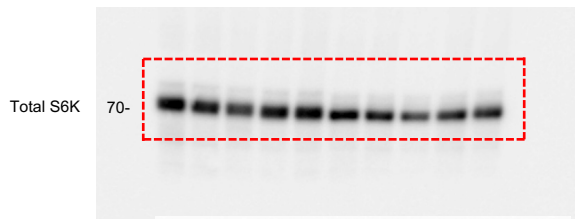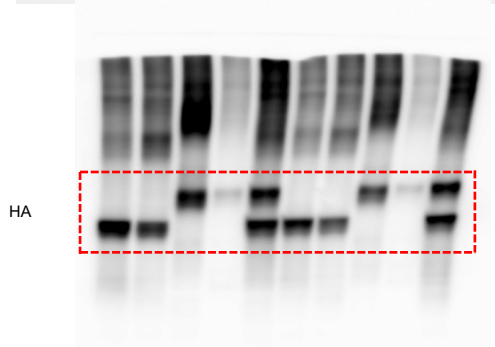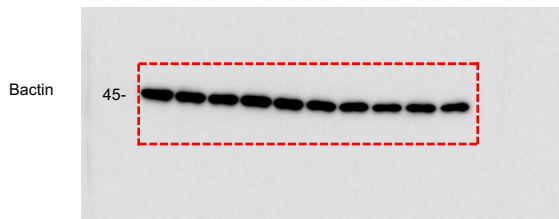

## S2B

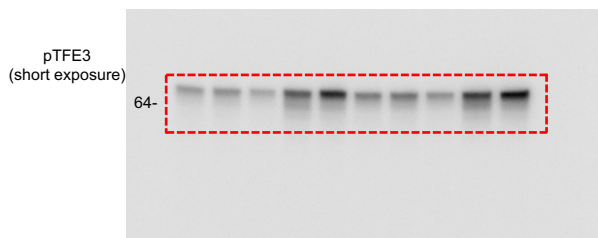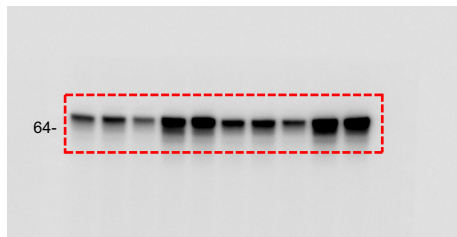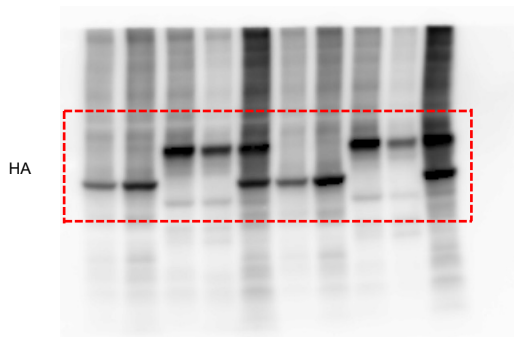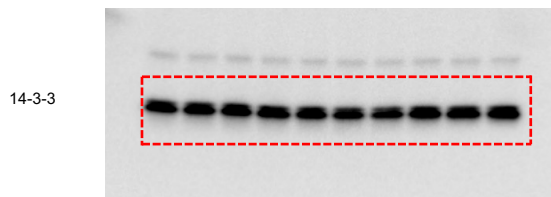

S2C

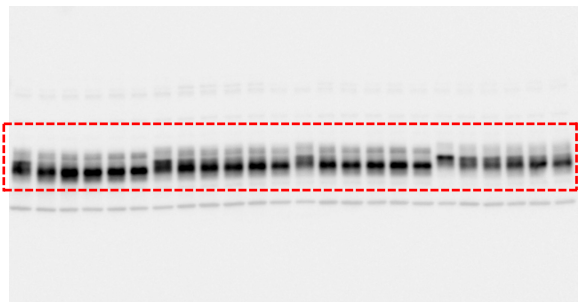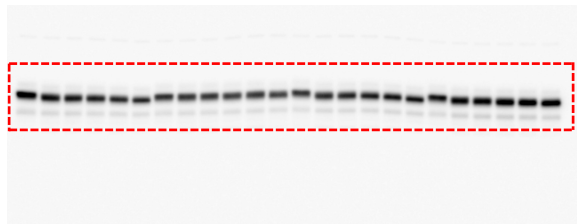

Total 4E-BP1

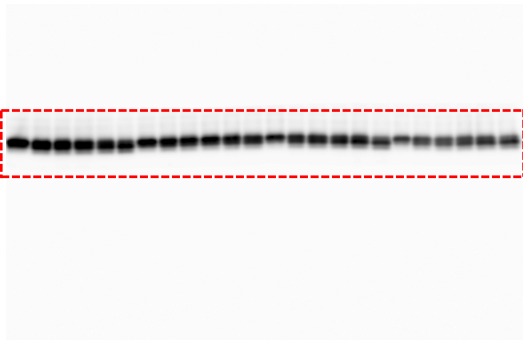

S3A

RagC

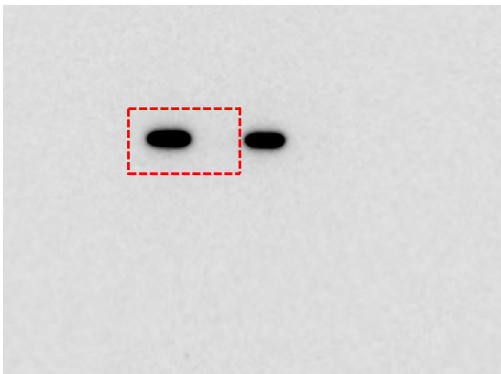

Actin

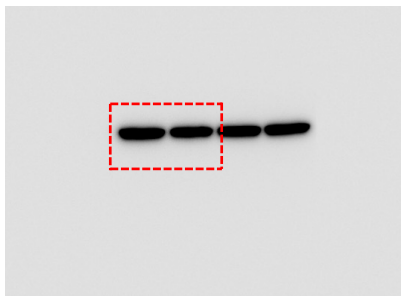

Supplement: pbio.3001594.s005.pdf [file pbio.3001594.s005.pdf]
